# Supplementary material for: Immobilization of Cellulolytic Enzymes in Accurel® MP1000
Source: MDPI journal article supplement (doi:10.3390/reactions4020019), 2023-06-16
Supplement: s1 [file s1]

Archive with 1 entries (1 files):
- reactions-2363636-supplementary.pdf
