# Supplementary material for: Immobilization of Cellulolytic Enzymes in Accurel® MP1000
Source: MDPI journal article supplement (doi:10.3390/reactions4020019), 2023-06-16
Supplement: s1 [file s1 › reactions-2363636-supplementary.pdf]

# Immobilization of Cellulolytic Enzymes in Accurel® MP1000

Julia R. S. Baruque<sup>1</sup>, Adriano Carniel<sup>1</sup>, Julio Cesar S. Sales<sup>1</sup>, Bernardo D. Ribeiro<sup>1</sup>, Rodrigo P. do Nascimento<sup>1</sup> and Ivaldo Itabaiana Jr.<sup>1,\*</sup>

## SUPPORTING INFORMATION

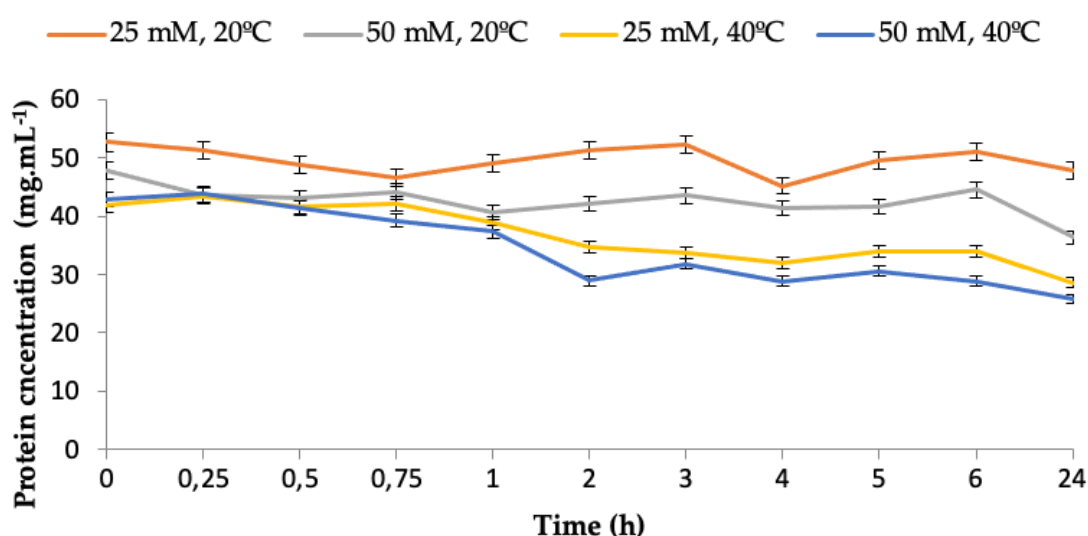

**Figure S1.** Total Protein concentration showed by *Celluclast*® 1.5L cocktail immobilization in Accurel® MP 1000 through the time in each studied condition.

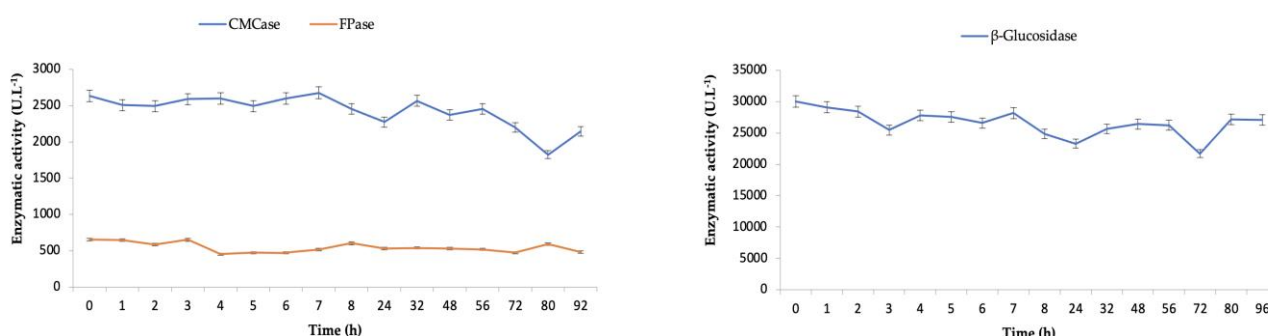

**Figure S2.** Residual enzyme activity in the supernatant during immobilization of *Celluclast*® 1.5 L cocktail in Accurel MP1000. Immobilization conditions: 45 mg. mL<sup>-1</sup> of enzymatic extract in 50mL of 50 mM citrate buffer at 40 °C and 100 rpm.
